# Supplementary material for: Temporal Stability and Composition of the Ocular Surface Microbiome
Source: PubMed Central journal article supplement (PMC5575025; doi:10.1038/s41598-017-10494-9), 2017-08-29

## Supplementary Information

### Temporal Stability and Composition of the Ocular Surface Microbiome

Jerome Ozkan, Shaun Nielsen, Cristina Diez-Vives, Minas Coroneo, Torsten Thomas, Mark Willcox

**Supplementary Figure 1:** Colony forming units per swab of bacterial taxa isolated from the ocular surface from 43 subjects sampled monthly for three months (n = 132)

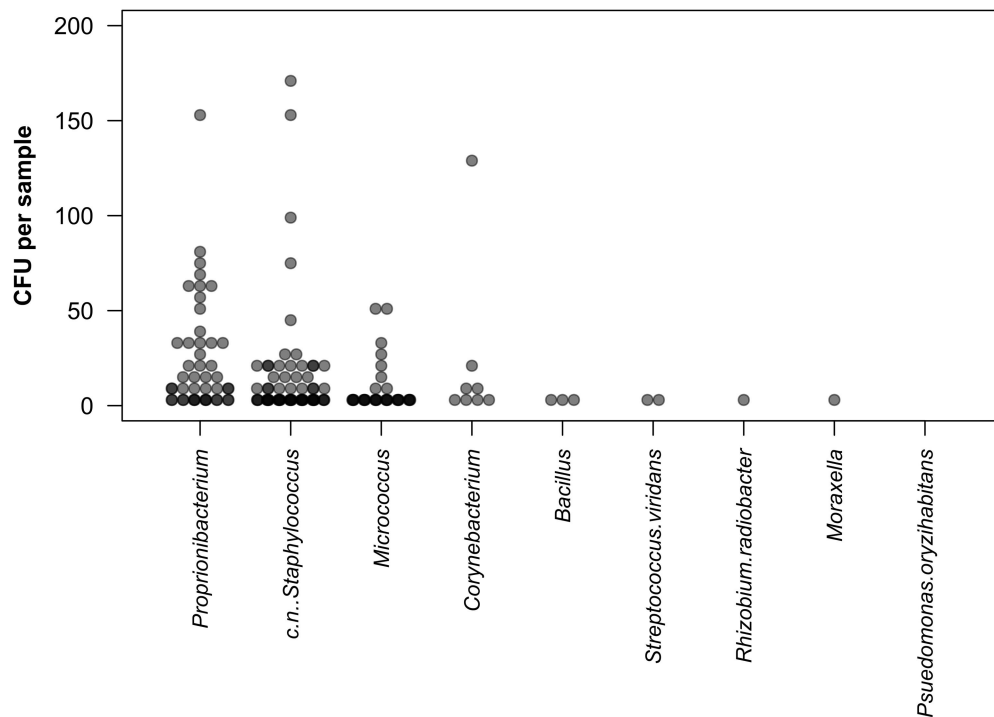

**Supplementary Figure 2:** OTU rarefaction

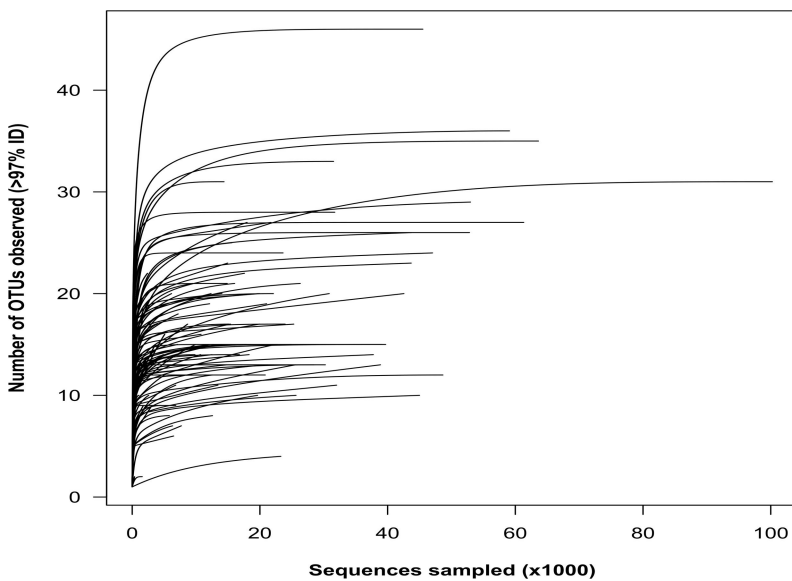

**Supplementary Figure 3: Microbial richness at OTU level for (a) time, (b) individuals, (c) sex, and (d) age**

**(a) Time** ( $P = 0.046$ )

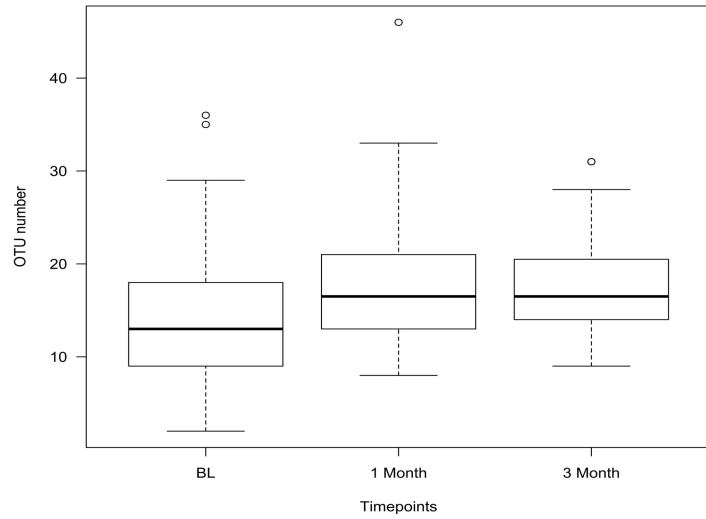

**(b) Individuals** ( $P = 0.841$ )

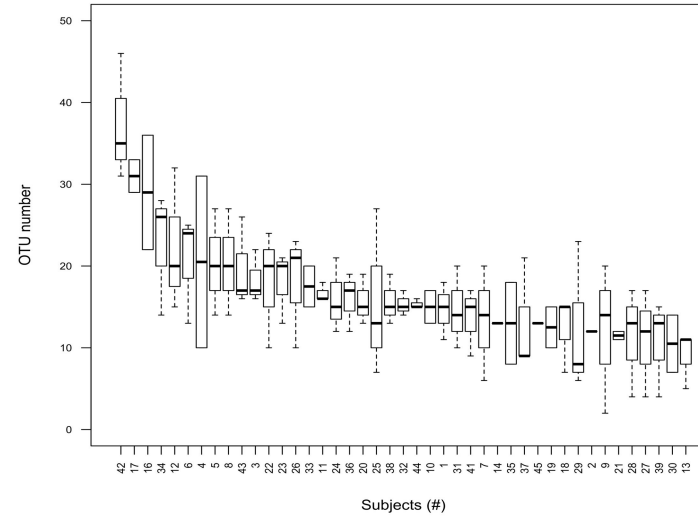

**(c) Sex** ( $P = 0.220$ )

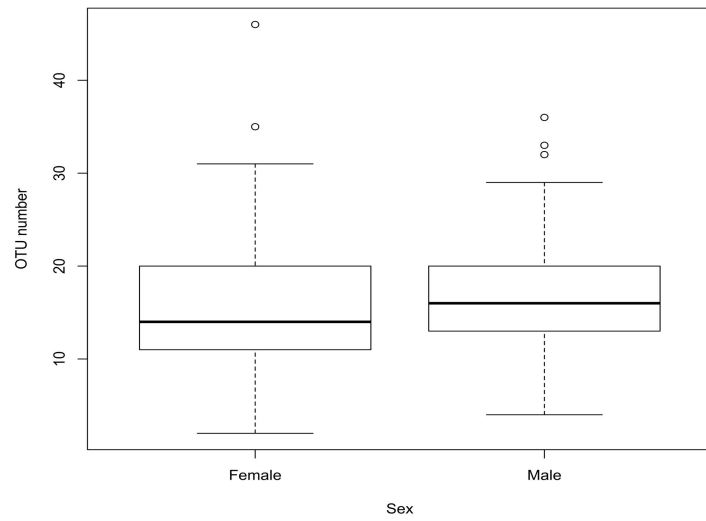

**(d) Age** ( $P = 0.0179$ )

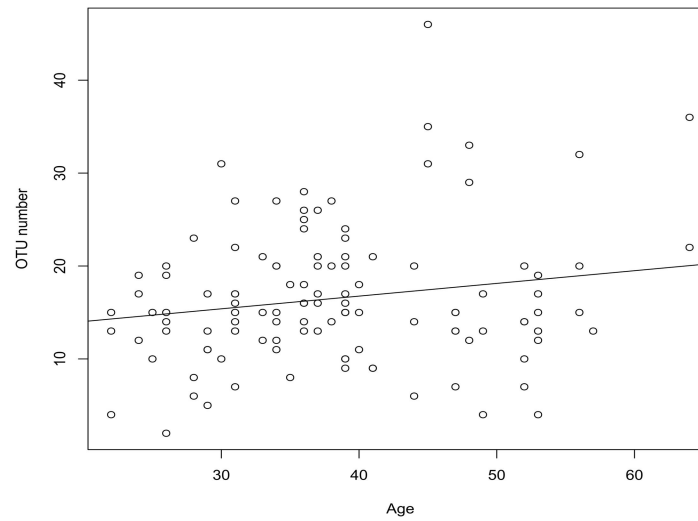

**Supplementary Figure 4: Shannon diversity index at OTU level for, (a) time, (b) individuals, (c) sex and (d) age**

**(a) Time** ( $P = 0.049$ )

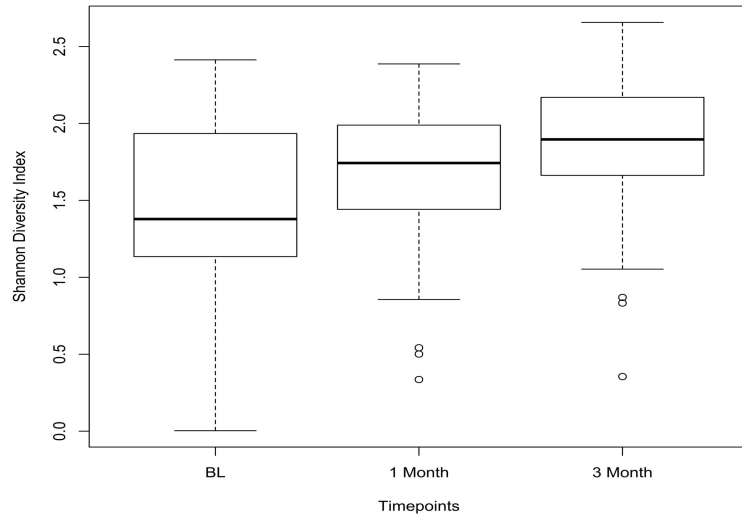

**(b) Individuals** ( $P = 1.000$ )

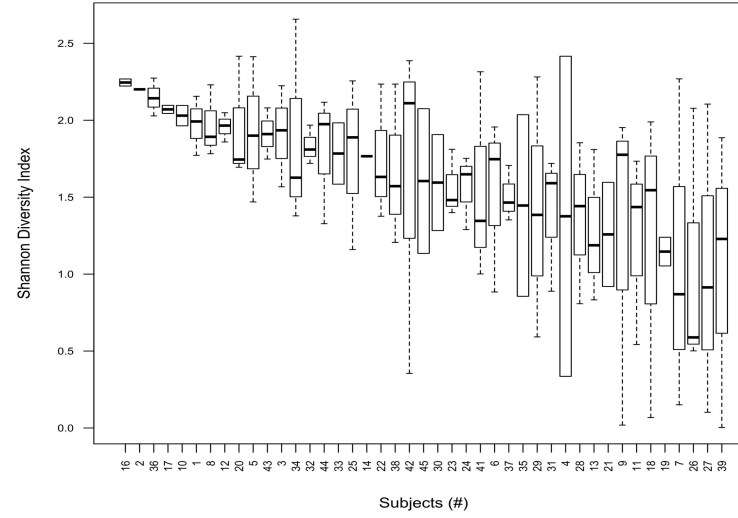

**(c) Sex** ( $P = 0.040$ )

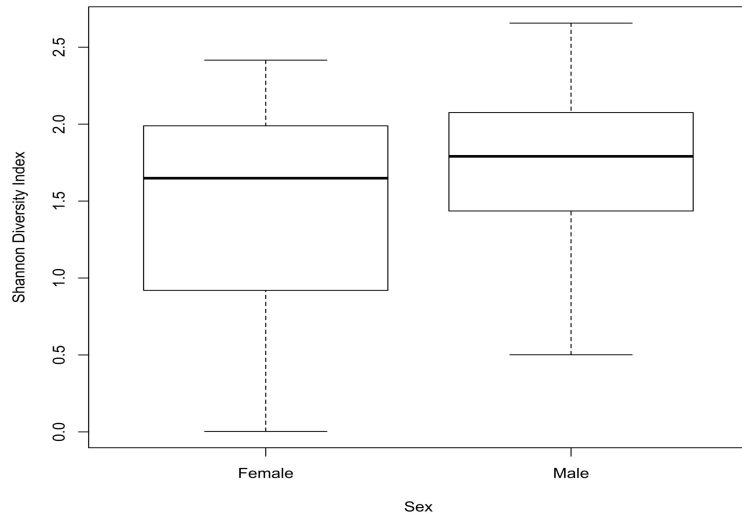

**(d) Age** ( $P = 0.929$ )

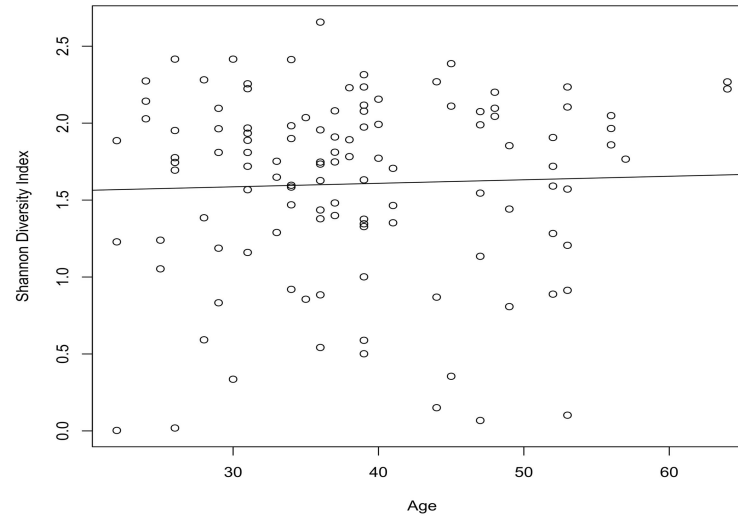

**Supplementary Figure 5: Relative abundance at the level of, (a) phylum, (b) genus**

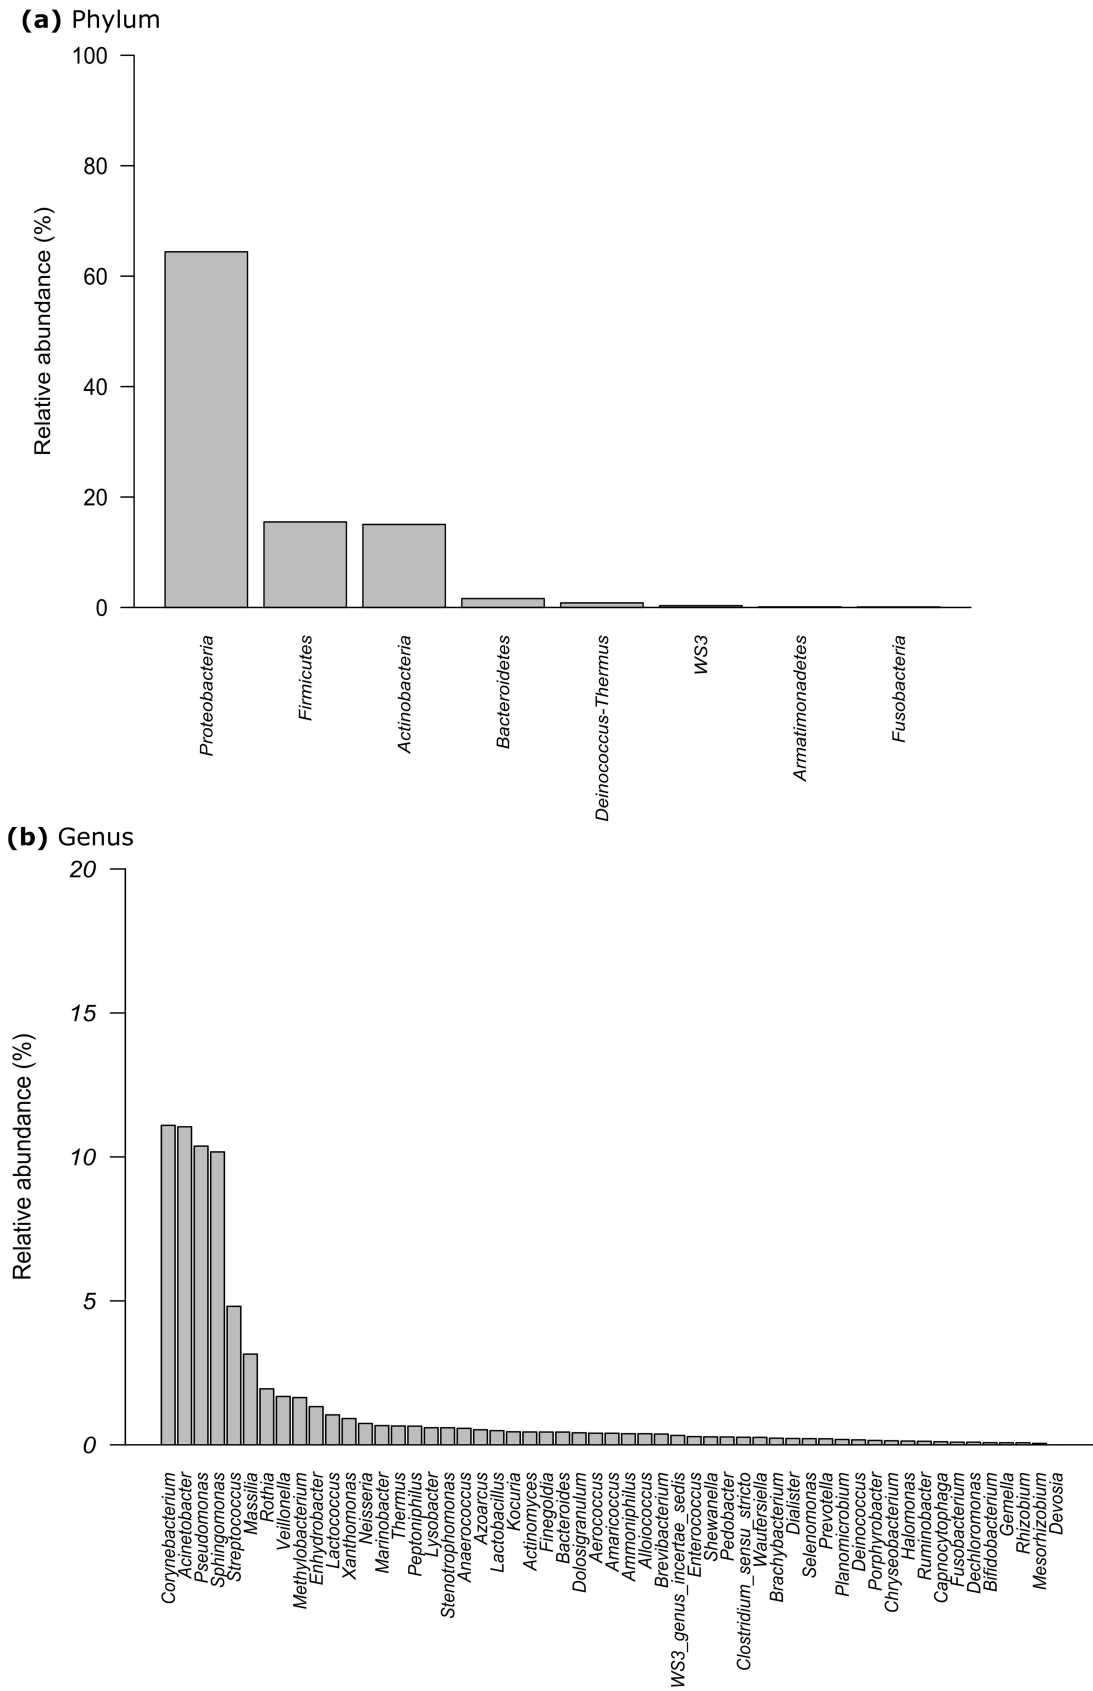

**Supplementary Figure 6:** Sequence counts (Log10) per sample. Samples with < 10,000 sequences (indicated by dashed line) were removed.

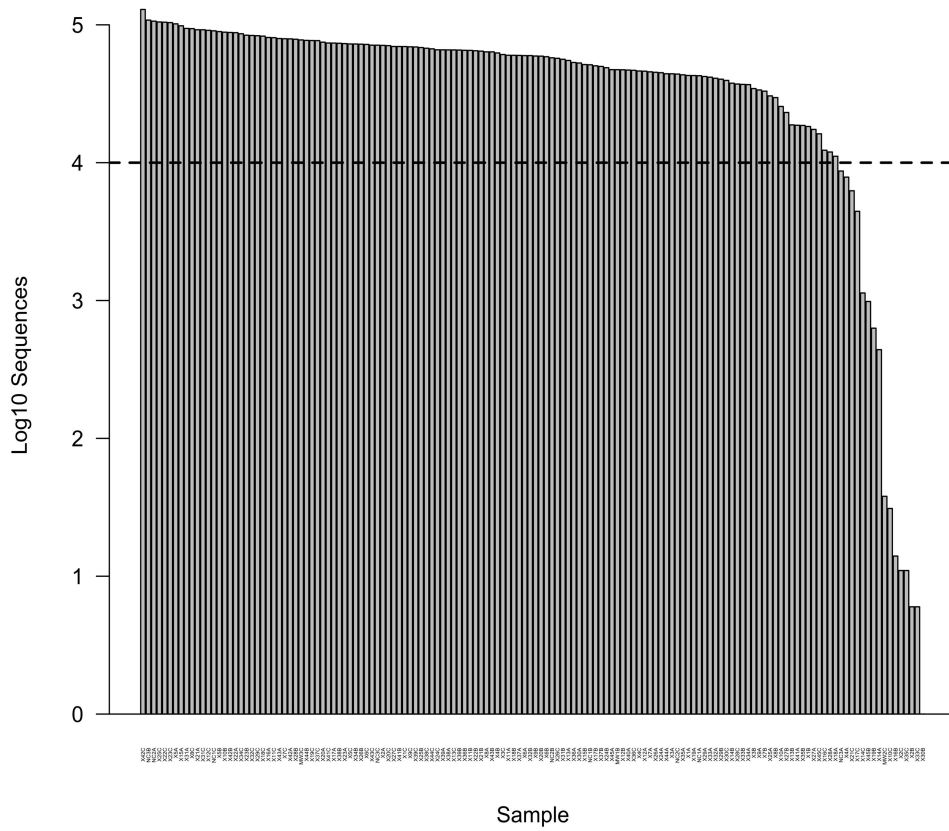

**Supplementary Figure 7:** OTU relative abundance. OTUs present at less than 0.0001% relative abundance (indicated by dashed line) were removed.

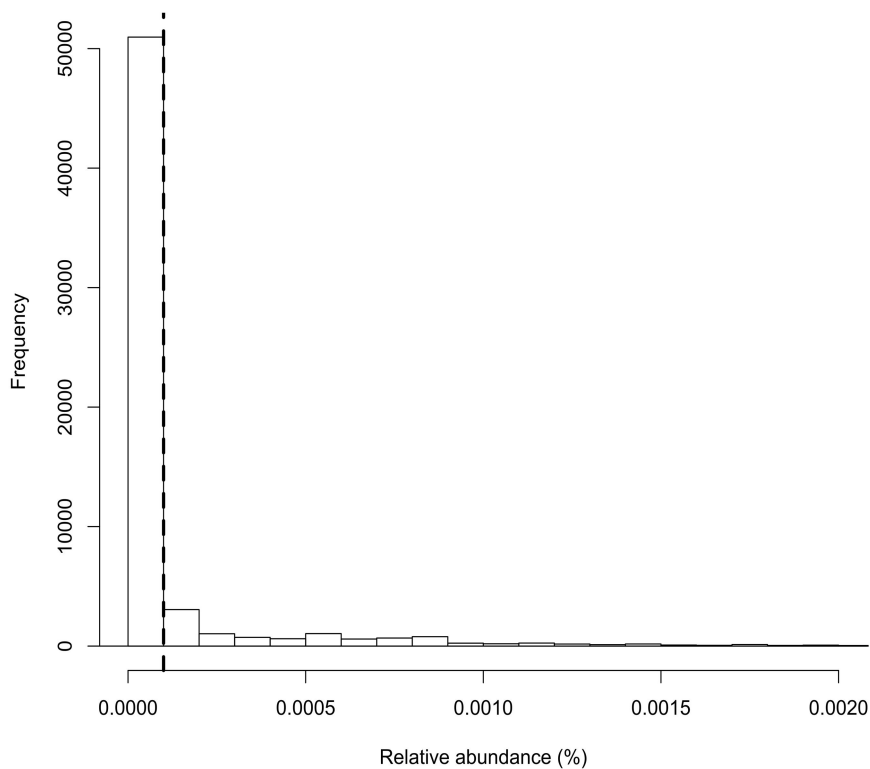

**Supplementary Figure 8:** Linear regression filter to determine OTUs present on ocular surface samples, **(a)** Initial linear regression filter, **(b)** Linear regression filter repeated (OS = ocular samples, NC = negative control samples, Black = 1:1 line, Red = regression line, Green = standard error [SE] line, Blue = SE multiplied by a factor of five, Aqua = exponent of 5x SE; Black circles = OTUs; Green points = retained OTUs after initial filter; Aqua points = final retained OS OTUs )

**(a)** Initial linear regression filter

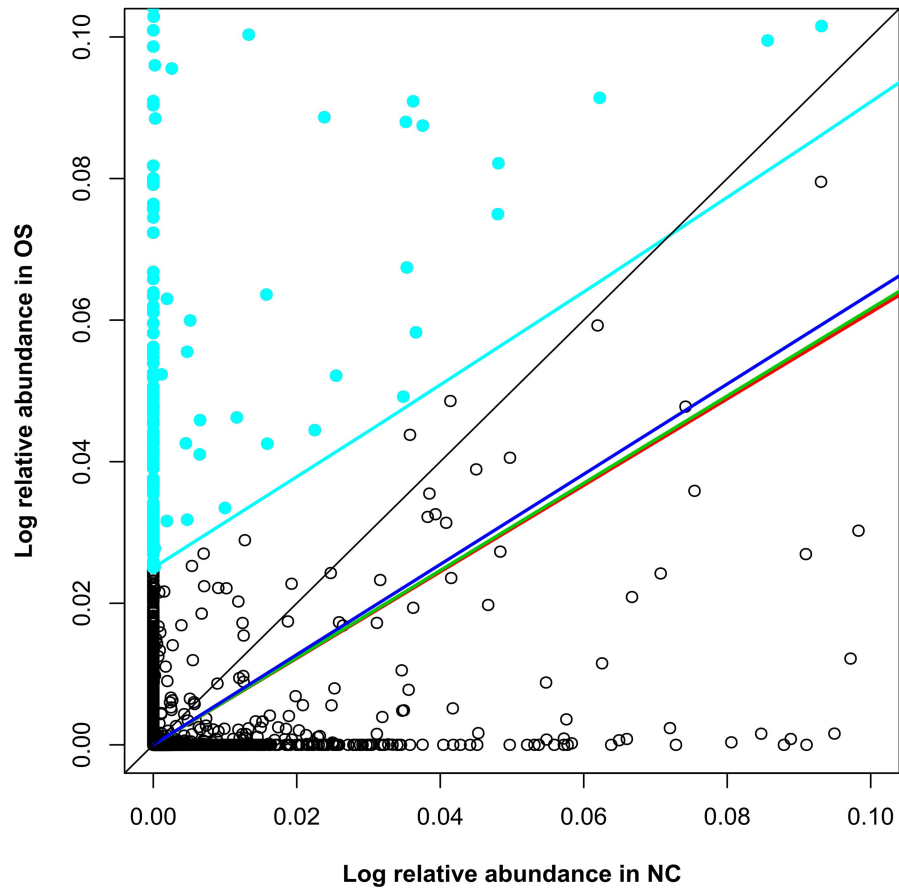

**(b)** Final linear regression filter

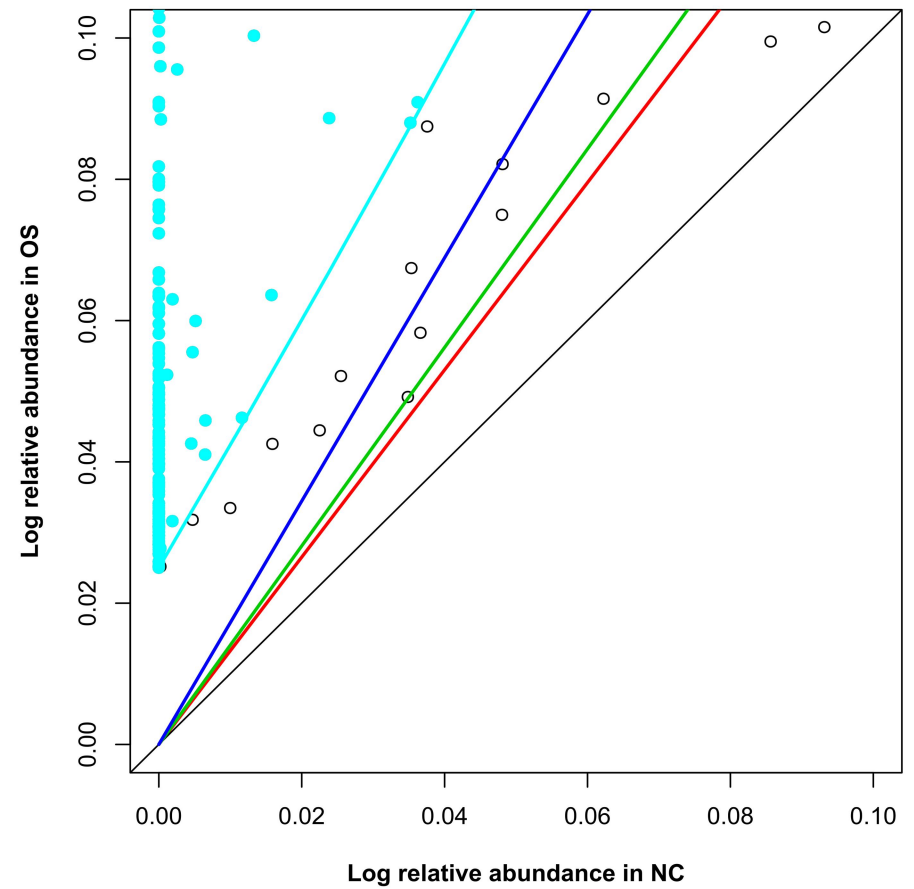

Supplement: 41598_2017_10494_MOESM1_ESM.pdf [file 41598_2017_10494_MOESM1_ESM.pdf]
